# Supplementary material
Source: HighWire-hosted journal article supplement (https://www.cmajopen.ca/highwire/filestream/81130/field_highwire_adjunct_files/2/2018-0025-3-at.pdf)
Supplement: 2018-0025-3-at.pdf [file 2018-0025-3-at.pdf]

**Appendix 3 (as supplied by the authors): Smokers' overall support for cigarette and e-cigarette endgame policies**

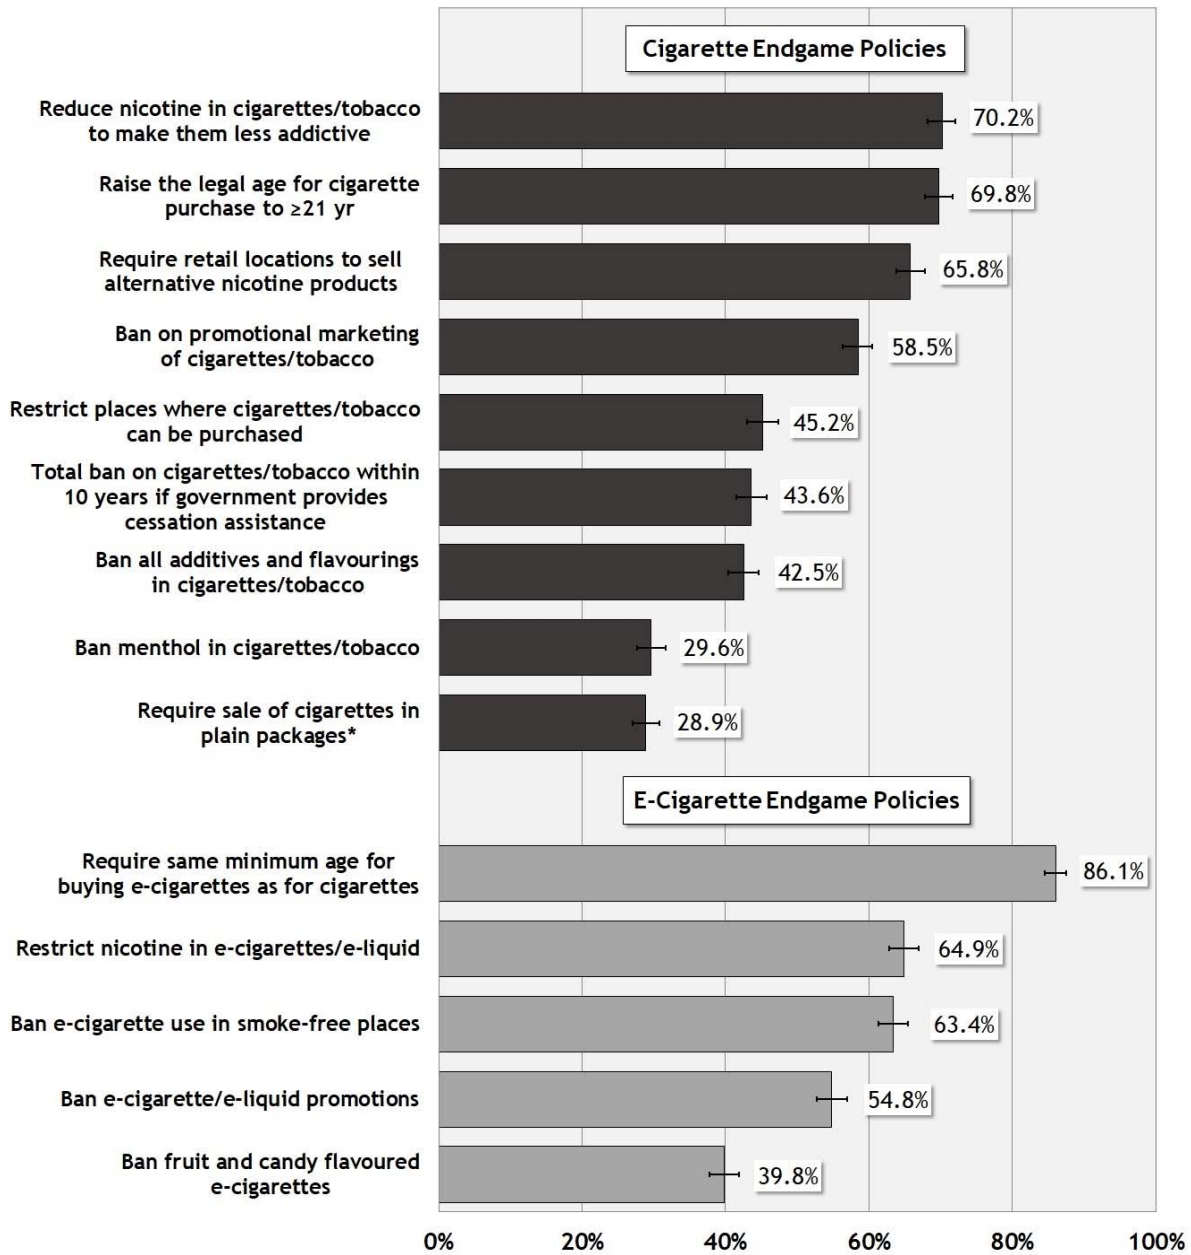

\* Responses for this question were "agree/strongly agree"
